# Supplementary material
Source: publisher figshare collection journal article supplement (https://gsapubs.figshare.com/ndownloader/files/30834418)
Supplement: Supplementary file 1 [file 30834418]

## Sheet: Plagioclase
Supplementary Table 7
Representative microprobe analyses of plagioclase from the Daocheng batholith.
rock type	MME I	MME I	MME I	MME I	MME I	MME I	MME I	MME I	MME I	MME I	MME I	MME I	MME I	MME I	MME I	MME I	MME I	MME II	MME II	MME II	MME II	MME II	MME II	MME II	MME II	MME II	Quartz diorite	Quartz diorite	Quartz diorite	Quartz diorite	Quartz diorite	Quartz diorite	Quartz diorite	Quartz diorite	Quartz diorite	Quartz diorite	Quartz diorite	Granodiorite	Granodiorite	Granodiorite	Granodiorite	Granodiorite	Granodiorite	Granodiorite	Granodiorite	Granodiorite	Granodiorite	Granodiorite	Granodiorite
sample no.	18DC48-Pl-01	18DC48-Pl-02	18DC48-Pl-03	18DC48-Pl-04	18DC48-Pl-05	18DC48-Pl-06	18DC48-Pl-07	18DC44-Pl-01	18DC44-Pl-02	18DC44-Pl-03	18DC44-Pl-04	18DC44-Pl-05	18DC44-Pl-06	18DC44-Pl-07	18DC44-Pl-08	18DC44-Pl-09	18DC44-Pl-10	18DC54-Pl-01	18DC54-Pl-02	18DC54-Pl-03	18DC54-Pl-04	18DC54-Pl-05	18DC54-Pl-06	18DC65-Pl-01	18DC65-Pl-02	18DC65-Pl-03	18DC45-Pl-01	18DC45-Pl-02	18DC45-Pl-03	18DC45-Pl-04	18DC45-Pl-05	18DC45-Pl-06	18DC45-Pl-07	18DC45-Pl-08	18DC45-Pl-09	18DC45-Pl-10	18DC45-Pl-11	18DC50-Pl-01	18DC50-Pl-02	18DC50-Pl-03	18DC50-Pl-04	18DC50-Pl-05	18DC50-Pl-06	18DC51-Pl-01	18DC51-Pl-02	18DC51-Pl-03	18DC51-Pl-04	18DC51-Pl-05	18DC51-Pl-06
SiO2(wt.%)	56.009	56.609	56.381	55.577	56.81	56.161	55.791	57.217	57.98	50.359	54.994	58.041	52.627	57.683	57.518	53.633	59.516	57.676	58.136	58.298	58.021	57.011	49.35	55.374	55.382	55.582	56.647	57.114	55.965	56.498	48.427	55.532	57.946	53.458	56.939	56.047	56.47	56.333	55.439	56.585	56.143	55.831	55.817	61.773	58.344	59.134	58.764	59.284	57.662
TiO2(wt.%)	0	0	0	0	0.008	0	0.007	0	0	0	0	0.011	0.004	0	0	0.019	0	0	0.027	0.036	0.004	0	0	0.014	0	0.003	0.001	0.018	0	0	0	0	0	0	0.013	0	0	0	0	0	0.019	0.011	0	0	0.009	0.005	0.039	0	0.007
Al2O3(wt.%)	27.253	26.715	26.777	27.761	26.597	27.301	27.393	26.827	25.926	31.306	27.693	25.927	29.491	26.32	26.552	29.308	25.129	26.508	25.8	26.035	25.959	26.604	32.034	27.271	27.76	27.331	26.798	26.347	27.246	27.246	32.611	27.401	25.933	28.473	26.925	27.648	27.136	26.385	26.934	26.673	26.714	26.895	27.352	23.752	25.846	25.07	25.661	25.249	26.341
FeOT(wt.%)	0.088	0.095	0.062	0.076	0.068	0.035	0.068	0.047	0.068	0.028	0.048	0.033	0.034	0.036	0.06	0.074	0.047	0.096	0.035	0.042	0.064	0.042	0.033	0.072	0.121	0.056	0.04	0.035	0.032	0.042	0.033	0.034	0.042	0.066	0.033	0.055	0.045	0.076	0.073	0.041	0.093	0.068	0.062	0.036	0.106	0.089	0.124	0.09	0.103
MnO(wt.%)	0	0.01	0	0.014	0	0.027	0.015	0	0.003	0	0.001	0	0.009	0.027	0.032	0	0	0	0.004	0.016	0	0.022	0	0.007	0	0	0.023	0	0.009	0	0	0	0	0	0	0.022	0	0	0	0.017	0.016	0.03	0.02	0	0	0	0	0.009	0.002
MgO(wt.%)	0.015	0	0.009	0.011	0.002	0.003	0.014	0	0	0.011	0.005	0	0.013	0.001	0	0	0.003	0	0.002	0.001	0	0.005	0.012	0.004	0.035	0.005	0.004	0.019	0.004	0.004	0.002	0.004	0.012	0.001	0.011	0.001	0.015	0.021	0.01	0	0.004	0	0.001	0.016	0	0.037	0.01	0	0.004
CaO(wt.%)	9.758	9.097	9.403	10.407	9.244	10.001	9.926	9.448	8.756	14.878	10.704	8.463	12.998	8.97	9.123	12.45	7.305	8.817	8.326	8.477	8.542	9.363	15.424	10.287	10.48	9.787	9.568	9.032	9.736	9.99	16.727	10.38	8.512	11.809	9.747	10.271	9.897	9.236	9.809	9.048	9.184	9.635	9.902	5.748	8.321	7.097	7.811	7.21	8.537
Na2O(wt.%)	5.774	6.417	5.943	5.546	5.96	5.81	5.798	6.079	6.36	2.921	5.365	6.393	3.893	6.238	6.232	4.427	7.05	6.336	6.29	6.655	6.39	6.125	2.586	5.671	5.418	5.679	5.933	6.13	5.686	5.665	2.132	5.187	6.312	4.626	5.693	5.526	5.514	6.137	5.723	6.087	5.955	5.922	5.718	8.184	6.65	7.037	6.76	7.045	6.608
K2O(wt.%)	0.16	0.192	0.083	0.14	0.234	0.122	0.167	0.161	0.26	0.062	0.195	0.251	0.133	0.157	0.149	0.135	0.294	0.154	0.181	0.178	0.266	0.147	0.05	0.166	0.194	0.229	0.199	0.213	0.172	0.169	0.04	0.159	0.243	0.139	0.205	0.204	0.169	0.237	0.199	0.165	0.18	0.185	0.169	0.227	0.298	0.4	0.398	0.397	0.223
P2O5(wt.%)	0.004	0.009	0.012	0	0	0.013	0	0.001	0.012	0.01	0	0	0.009	0.022	0	0.028	0.021	0	0.005	0	0.003	0.003	0.034	0	0.018	0.004	0	0.014	0.008	0	0.03	0.015	0	0.013	0	0.01	0	0	0.023	0	0.01	0	0	0	0	0.014	0	0	0.006
BaO(wt.%)	0	0	0	0	0.028	0.028	0	0.035	0.012	0	0	0.016	0	0	0	0.088	0	0	0	0.035	0.049	0.051	0.007	0.049	0	0	0	0.07	0	0.002	0.019	0.044	0	0.004	0.056	0.016	0.046	0	0.004	0.019	0	0.025	0	0	0	0.032	0	0.054	0.014
SrO (wt.%)	0.237	0.203	0.304	0.259	0.265	0.231	0.241	0.239	0.206	0.161	0.254	0.236	0.159	0.19	0.155	0.13	0.228	0.153	0.243	0.252	0.203	0.211	0.195	0.209	0.221	0.24	0.238	0.25	0.252	0.228	0.193	0.261	0.203	0.283	0.245	0.27	0.268	0.268	0.246	0.216	0.319	0.22	0.189	0.199	0.2	0.228	0.196	0.207	0.192
Total(wt.%)	99.298	99.347	98.974	99.791	99.216	99.732	99.42	100.054	99.583	99.736	99.259	99.371	99.37	99.644	99.821	100.292	99.593	99.74	99.049	100.025	99.501	99.584	99.725	99.124	99.629	98.916	99.451	99.242	99.11	99.844	100.214	99.017	99.203	98.872	99.867	100.07	99.56	98.693	98.46	98.851	98.637	98.822	99.23	99.935	99.774	99.143	99.763	99.545	99.699
An	47.84	43.45	46.42	50.5	45.52	48.41	48.15	45.78	42.56	73.52	51.85	41.63	64.34	43.87	44.33	60.37	35.79	43.08	41.79	40.89	41.83	45.4	76.5	49.58	51.08	48.13	46.58	44.32	48.13	48.87	81.07	52.02	42.09	58.04	48.03	50.07	49.3	44.78	48.08	44.66	45.52	46.84	48.42	27.6	40.18	34.95	38.07	35.29	41.12
Ab	51.23	55.46	53.09	48.7	53.11	50.89	50.89	53.3	55.94	26.12	47.03	56.9	34.87	55.21	54.8	38.85	62.5	56.02	57.13	58.09	56.62	53.75	23.21	49.46	47.79	50.53	52.27	54.43	50.86	50.15	18.7	47.04	56.48	41.14	50.77	48.75	49.7	53.85	50.76	54.37	53.41	52.09	50.6	71.1	58.11	62.71	59.62	62.4	57.6
Or	0.93	1.09	0.49	0.81	1.37	0.7	0.96	0.93	1.5	0.36	1.12	1.47	0.78	0.91	0.86	0.78	1.71	0.9	1.08	1.02	1.55	0.85	0.3	0.95	1.13	1.34	1.15	1.24	1.01	0.98	0.23	0.95	1.43	0.81	1.2	1.18	1	1.37	1.16	0.97	1.06	1.07	0.98	1.3	1.71	2.35	2.31	2.31	1.28
[truncated: 15 more columns]

## Sheet: Amphibole
Supplementary Table 7
Representative microprobe analyses of amphibole from the Daocheng batholith.
rock type	MME I	MME I	MME I	MME I	MME I	MME I	MME I	MME I	Quartz diorite	Quartz diorite	Quartz diorite	Quartz diorite	Quartz diorite	Quartz diorite	Quartz diorite	MME II	MME II	MME II	MME II	MME II	MME II	MME II	MME II	MME II	MME II	MME II	Granodiorite	Granodiorite	Granodiorite	Granodiorite	Granodiorite	Monzogranite	Monzogranite	Monzogranite	Monzogranite	Monzogranite
sample no.	18DC43-Am-01	18DC43-Am-02	18DC43-Am-03	18DC43-Am-04	18DC43-Am-05	18DC43-Am-06	18DC48-Am-01	18DC48-Am-02	18DC45-Am-01	18DC45-Am-02	18DC45-Am-03	18DC45-Am-04	18DC45-Am-05	18DC45-Am-06	18DC45-Am-07	18DC54-Am-01	18DC54-Am-02	18DC54-Am-03	18DC54-Am-04	18DC54-Am-05	18DC54-Am-06	18DC54-Am-07	18DC54-Am-08	18DC65-Am-01	18DC65-Am-02	18DC65-Am-03	18DC50-Am-01	18DC50-Am-02	18DC50-Am-03	18DC50-Am-04	18DC50-Am-05	18DC65-Am-01	18DC65-Am-02	18DC65-Am-03	18DC65-Am-04	18DC65-Am-05
SiO2(wt.%)	49.376	49.578	49.107	49.419	49.118	48.314	46.309	47.246	50.43	50.234	50.877	51.489	50.524	51.605	50.13	50.171	46.202	48.296	49.559	47.049	47.887	48.715	48.924	51.555	47.957	48.605	47.529	50.705	50.101	50.285	47.971	47.614	49.034	48.152	52.093	48.888
TiO2(wt.%)	0.739	0.972	1.048	0.704	0.756	1.285	1.543	1.185	0.693	0.647	0.744	0.543	0.655	0.577	0.899	0.6	1.33	1.335	0.755	1.081	1.033	0.969	0.857	0.409	1.154	1.354	1.58	0.552	0.668	0.681	1.519	1.355	0.554	1.145	0.313	0.716
Al2O3(wt.%)	5.683	5.927	6.227	5.886	5.623	6.216	8.164	7.359	5.637	5.399	5.109	4.267	5.109	4.751	5.89	5.179	8.293	6.787	5.762	7.717	7.018	6.416	6.538	4.484	6.864	6.465	7.419	5.248	5.509	5.294	6.902	6.29	5.127	5.669	2.749	5.59
Cr2O3(wt.%)	0.001	0.011	0	0.016	0.016	0.007	0.039	0.019	0.043	0.025	0.001	0.357	0.031	0.053	0.014	0.045	0.049	0.025	0.049	0.036	0.02	0.016	0.045	0.014	0.029	0.031	0.033	0.005	0.017	0.002	0.041	0.05	0.006	0.149	0.028	0.032
FeOT(wt.%)	17.992	18.187	18.499	18.146	17.841	18.927	18.456	17.97	15.58	16.233	15.164	15.921	15.934	15.199	16.147	16.144	17.802	16.877	16.397	17.386	17.144	17.042	16.575	15.975	16.999	15.819	16.655	16.602	16.429	16.068	16.509	19.216	20.01	19.809	18.882	19.757
MnO(wt.%)	0.574	0.533	0.543	0.573	0.604	0.669	0.539	0.547	0.463	0.518	0.414	0.586	0.493	0.366	0.45	0.525	0.477	0.493	0.517	0.484	0.481	0.526	0.452	0.509	0.501	0.364	0.376	0.511	0.519	0.501	0.483	0.33	0.712	0.737	0.648	0.712
MgO(wt.%)	10.434	10.4	10.183	10.246	10.263	9.717	9.114	9.969	11.88	11.918	12.326	12.41	12.085	12.563	11.701	12.14	10.026	11.054	11.593	10.479	10.807	11.16	11.341	12.689	10.882	12.035	11.145	12.18	11.909	12.222	10.963	10.301	9.852	9.423	11.215	10.125
CaO(wt.%)	11.199	11.641	11.247	11.15	11.227	10.685	11.407	11.245	11.402	11.197	11.586	11.175	11.365	11.895	11.418	11.339	11.501	11.211	11.345	11.506	11.405	11.412	11.693	11.92	11.318	10.984	11.389	11.244	11.39	11.147	11.355	10.637	10.534	10.779	11.085	10.824
Na2O(wt.%)	0.628	0.588	0.686	0.569	0.604	0.798	0.806	0.788	0.592	0.664	0.45	0.466	0.505	0.326	0.625	0.57	0.882	0.796	0.612	0.758	0.75	0.841	0.681	0.528	0.827	0.942	0.911	0.551	0.636	0.617	0.875	1.168	0.819	1.021	0.342	0.928
K2O(wt.%)	0.568	0.595	0.62	0.565	0.526	0.634	0.855	0.726	0.44	0.406	0.413	0.279	0.387	0.335	0.48	0.469	0.93	0.669	0.554	0.859	0.768	0.629	0.68	0.377	0.7	0.606	0.703	0.495	0.524	0.455	0.708	0.671	0.454	0.549	0.235	0.532
P2O5(wt.%)	0.009	0.019	0.002	0.004	0.022	0.018	0.004	0.004	0.004	0	0	0.001	0.009	0	0.006	0.009	0.016	0.01	0	0.028	0.014	0.004	0	0.008	0	0.007	0	0	0.007	0	0.008	0.016	0.01	0.004	0.003	0.009
NiO(wt.%)	0	0	0.011	0	0.004	0.003	0.018	0	0	0	0	0	0.011	0.013	0	0.026	0	0	0.007	0	0.011	0.016	0.019	0	0.002	0	0.015	0	0	0.026	0	0	0.004	0	0.006	0.014
H2Omelt (wt.%)	6.59542	6.75591	6.68522	6.8541	6.81203	6.4201	7.36224	6.99016	6.69545	6.31238	6.37301	5.86887	6.28494	6.47821	6.59971	5.95105	6.72306	6.37444	6.28203	6.68425	6.47231	6.29984	6.47163	5.90274	6.41489	5.78249	6.34566	5.8607	6.08324	5.92812	6.29794	5.51379	6.15105	6.19968	5.41336	6.07005

## Sheet: Pyroxene
Supplementary Table 7
Representative microprobe analyses of pyroxene from the Daocheng batholith.
rock type	MME	MME	Quartz diorite	Quartz diorite
sample no.	18DC48-Px-01	18DC48-Px-02	18DC45-Px-01	18DC45-Px-02
SiO2(wt.%)	52.354	52.58	52.123	52.576
TiO2(wt.%)	0.089	0.083	0.191	0.138
Al2O3(wt.%)	0.558	0.39	1.057	0.594
Cr2O3(wt.%)	0.061	0.047	0.079	0.058
FeOT(wt.%)	10.514	10.608	9.756	9.455
MnO(wt.%)	0.444	0.445	0.539	0.606
MgO(wt.%)	12.65	12.572	12.881	12.723
CaO(wt.%)	22.305	22.631	22.722	23.275
NiO(wt.%)	0.005	0	0	0.01
Na2O(wt.%)	0.281	0.185	0.215	0.185
K2O(wt.%)	0.013	0	0.013	0
P2O5(wt.%)	0.021	0	0.007	0.012
Total(wt.%)	99.295	99.541	99.583	99.632
Wo	45.56	46.11	46.32	47.34
En	35.95	35.64	36.53	36.01
Fs	17.45	17.57	16.35	15.97
T (°C)	1071	1067	1090	1075

## Sheet: Biotite
Supplementary Table 7
Representative microprobe analyses of biotite from the Daocheng batholith.
rock type	MME I	MME I	MME I	MME I	MME I	MME I	MME I	MME I	MME I	Quartz diorite	Quartz diorite	Quartz diorite	Quartz diorite	Quartz diorite	Quartz diorite	Quartz diorite	Granodiorite	Granodiorite	Granodiorite	MME II	MME II	MME II	MME II	MME II	Monzogranite	Monzogranite	Monzogranite	Monzogranite
sample no.	18DC43-Bi-01	18DC43-Bi-02	18DC43-Bi-03	18DC44-Bi-01	18DC44-Bi-02	18DC44-Bi-03	18DC49-Bi-01	18DC49-Bi-02	18DC49-Bi-03	18DC45-Bi-01	18DC45-Bi-02	18DC45-Bi-03	18DC45-Bi-04	18DC45-Bi-05	18DC45-Bi-06	18DC45-Bi-07	18DC50-Bi-01	18DC50-Bi-02	18DC50-Bi-03	18DC65-Bi-01	18DC65-Bi-02	18DC65-Bi-03	18DC65-Bi-04	18DC65-Bi-05	18DC68-Bi-01	18DC68-Bi-02	18DC68-Bi-03	18DC68-Bi-04
SiO2(wt.%)	36.322	36.444	36.202	36.168	35.277	36.624	36.677	36.119	36.173	36.886	36.579	37.306	36.699	36.495	36.923	36.935	36.29	36.489	36.835	36.069	36.079	35.816	35.659	36.434	36.046	35.017	34.672	35.674
TiO2(wt.%)	3.112	3.21	3.166	2.968	2.274	3.522	3.39	3.159	3.422	3.641	3.732	3.262	3.635	3.34	3.735	3.585	4.685	2.947	2.823	3.662	3.082	4.081	3.911	3.91	3.431	4.364	4.16	3.702
Al2O3(wt.%)	15.443	15.816	15.802	15.325	15.851	15.506	15.345	15.565	15.169	15.715	15.463	15.816	15.223	15.209	15.387	15.367	14.443	15.287	15.76	14.773	14.618	14.334	14.067	14.767	14.404	13.712	13.79	13.9
FeOT(wt.%)	21.672	21.708	21.263	21.194	20.659	21.39	19.344	19.846	19.902	19.273	19.372	19.692	19.675	19.6	19.367	19.925	20.682	20.321	20.032	23.522	23.606	23.212	23.389	22.815	27.305	27.51	27.464	26.936
MnO(wt.%)	0.295	0.326	0.301	0.304	0.303	0.297	0.227	0.263	0.261	0.236	0.229	0.279	0.28	0.219	0.227	0.26	0.26	0.272	0.25	0.336	0.396	0.351	0.368	0.344	0.645	0.664	0.566	0.609
MgO(wt.%)	9.082	8.922	8.972	9.409	9.093	9.214	10.454	10.438	9.875	10.415	10.257	10.468	10.534	10.395	10.522	10.161	10.028	9.933	10.193	8.246	8.159	8.08	8.215	8.162	6.135	5.598	5.685	6.117
CaO(wt.%)	0	0	0.006	0.058	0.04	0	0.047	0.042	0	0	0	0.001	0.016	0	0.01	0.108	0	0	0.001	0.025	0.011	0.077	0	0.005	0.034	0	0	0
Na2O(wt.%)	0.095	0.121	0.116	0.159	0.149	0.116	0.184	0.173	0.221	0.176	0.217	0.205	0.171	0.216	0.145	0.189	0.121	0.119	0.14	0.214	0.155	0.183	0.183	0.156	0.386	0.083	0.042	0.121
K2O(wt.%)	9.475	9.509	9.336	9.001	9.563	9.202	9.016	9.471	8.949	9.078	9.082	9.265	8.936	9.024	9.278	8.812	9.291	9.654	9.382	9.101	9.358	9.13	9.423	9.204	8.943	9.009	9.108	9.165
F(wt.%)	0	0.109	0.056	0	0.009	0.013	0	0.017	0	0.099	0.109	0.027	0.096	0.092	0.018	0.087	0.036	0.051	0.06	0.174	0.125	0.184	0.115	0.072	0.316	0.111	0.375	0.417
Cl(wt.%)	0.124	0.114	0.101	0.141	0.11	0.134	0.086	0.11	0.168	0.122	0.14	0.127	0.137	0.144	0.128	0.152	0.231	0.094	0.091	0.12	0.102	0.114	0.173	0.126	0.199	0.112	0.117	0.164
Total	95.592	96.207	95.274	94.695	93.299	95.983	94.751	95.171	94.102	95.571	95.102	96.408	95.331	94.663	95.703	95.51	96	95.125	95.521	96.142	95.615	95.459	95.416	95.937	97.666	96.108	95.795	96.592
